# Supplementary material for: Enhanced Rh-anchoring on the composite metal phosphate Y0.33Zr2(PO4)3in three-way catalysis
Source: Royal Society of Chemistry journal article supplement (doi:10.1039/c9cy01274e), 2019-01-01
Supplement: c9cy01274e1.pdf [file c9cy01274e1.pdf]

Electronic Supplementary Information for

## Enhanced Rh-Anchoring by the Composite Metal Phosphate $Y_{0.33}Zr_2(PO_4)_3$ in Three-Way Catalysis

Haris Puspito Buwono,<sup>a,b</sup> Yasuhiro Omori,<sup>b</sup> Naoki Shioya,<sup>b</sup> Hiroshi Yoshida,<sup>c,d</sup> Satoshi Hinokuma,<sup>c,d</sup> Yuki Nagao,<sup>e</sup> Katsuya Iwashina,<sup>e</sup> Yoshinori Endo,<sup>e</sup> Yunosuke Nakahara<sup>e</sup> and Masato Machida<sup>c,d\*</sup>

---

<sup>a.</sup> Department of Mechanical Engineering, Politeknik Negeri Malang, Jl. Soekarno-Hatta No. 9, Malang, 65141, Jawa Timur, Indonesia

<sup>b.</sup> Department of Applied Chemistry and Biochemistry, Graduate School of Science and Technology, Kumamoto University 2-39-1 Kurokami, Chuo, Kumamoto 860-8555, Japan

<sup>c.</sup> Division of Materials Science and Chemistry, Faculty of Advanced Science and Technology, Kumamoto University, 2-39-1 Kurokami, Chuo, Kumamoto 860-8555, Japan

<sup>d.</sup> Elements Strategy Initiative for Catalysts & Batteries, Kyoto University 1-30 Goryo-Ohara, Nishikyo, Kyoto 615-8245, Japan

<sup>e.</sup> Catalysts Strategic Division, Engineered Materials Sector, Mitsui Mining & Smelting Co., Ltd., 1013-1 Ageosimo, Ageo, Saitama 362-0025, Japan

\*Corresponding author: machida@kumamoto-u.ac.jp

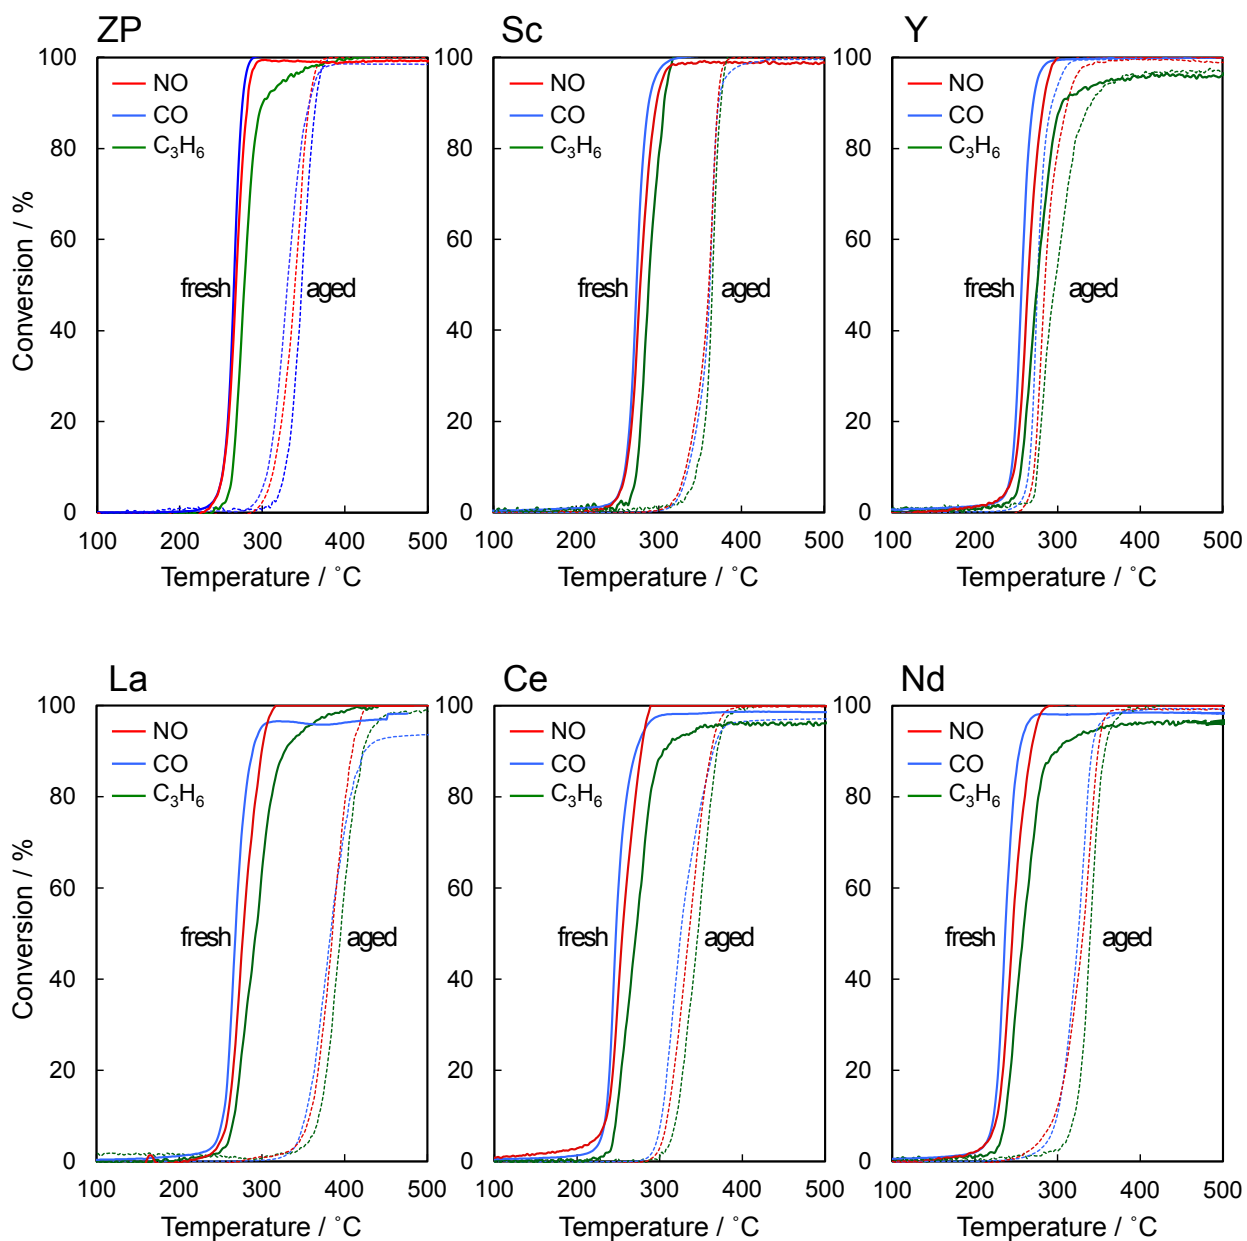

**Figure S1.** Light-off curves for NO, CO, and C<sub>3</sub>H<sub>6</sub> for Rh catalysts (0.4 wt% loading) supported on ZP and Ln<sub>0.33</sub>Zr<sub>2</sub>(PO<sub>4</sub>)<sub>3</sub> as-prepared (fresh) and after thermal ageing at 900 °C for 25 h in 10% H<sub>2</sub>O/air.

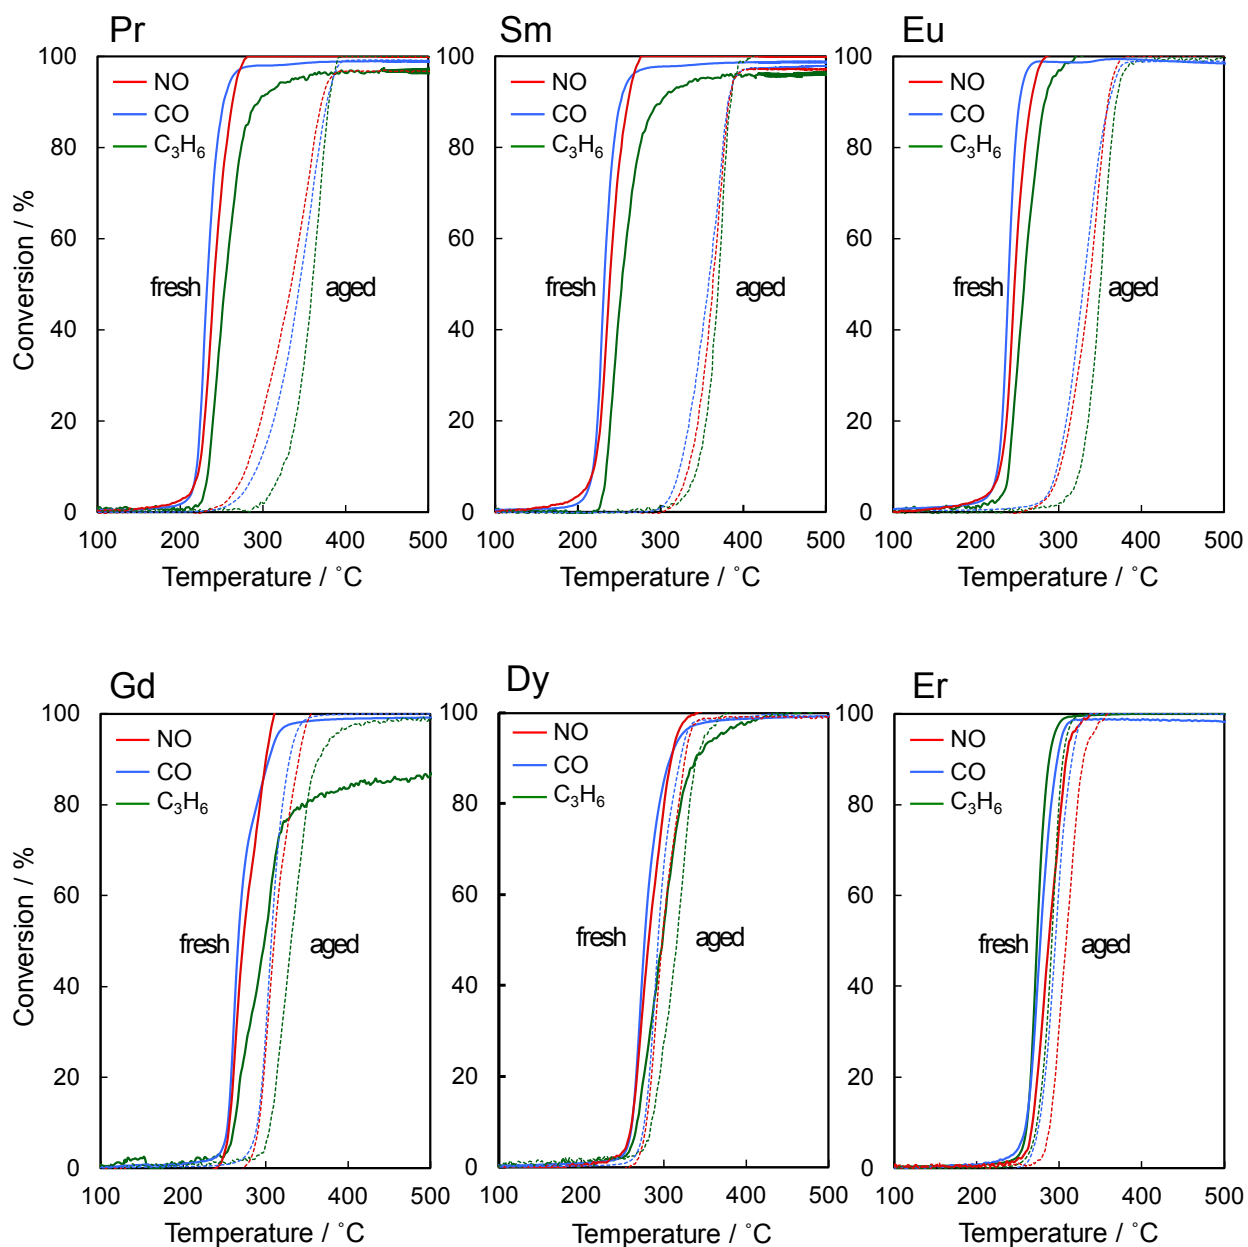

**Figure S1 (Continued).** Light-off curves for NO, CO, and C<sub>3</sub>H<sub>6</sub> for Rh catalysts (0.4 wt% loading) supported on ZP and Ln<sub>0.33</sub>Zr<sub>2</sub>(PO<sub>4</sub>)<sub>3</sub> as-prepared (fresh) and after thermal ageing at 900 °C for 25 h in 10% H<sub>2</sub>O/air.

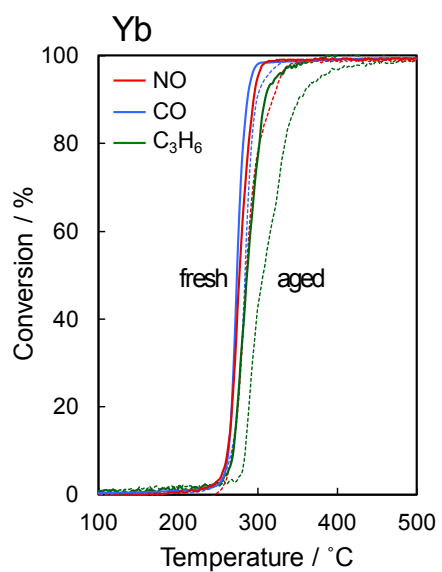

**Figure S1 (Continued).** Light-off curves for NO, CO, and C<sub>3</sub>H<sub>6</sub> for Rh catalysts (0.4 wt% loading) supported on ZP and Ln<sub>0.33</sub>Zr<sub>2</sub>(PO<sub>4</sub>)<sub>3</sub> as-prepared (fresh) and after thermal ageing at 900 °C for 25 h in 10% H<sub>2</sub>O/air.

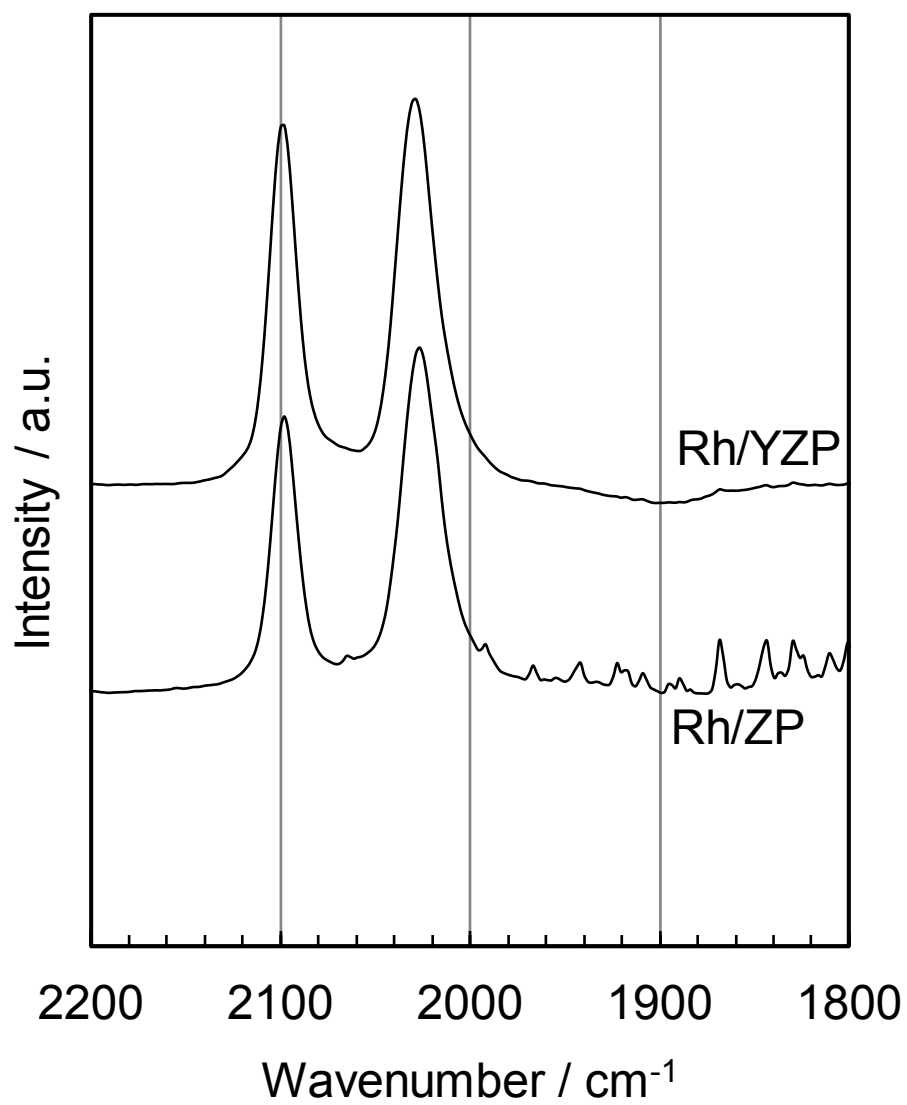

**Figure S2.** *In situ* FT-IR spectra for CO adsorbed on Rh/YZP and Rh/ZP at 200 °C. Before CO adsorption, the catalysts were reduced by H<sub>2</sub> at 200 °C.

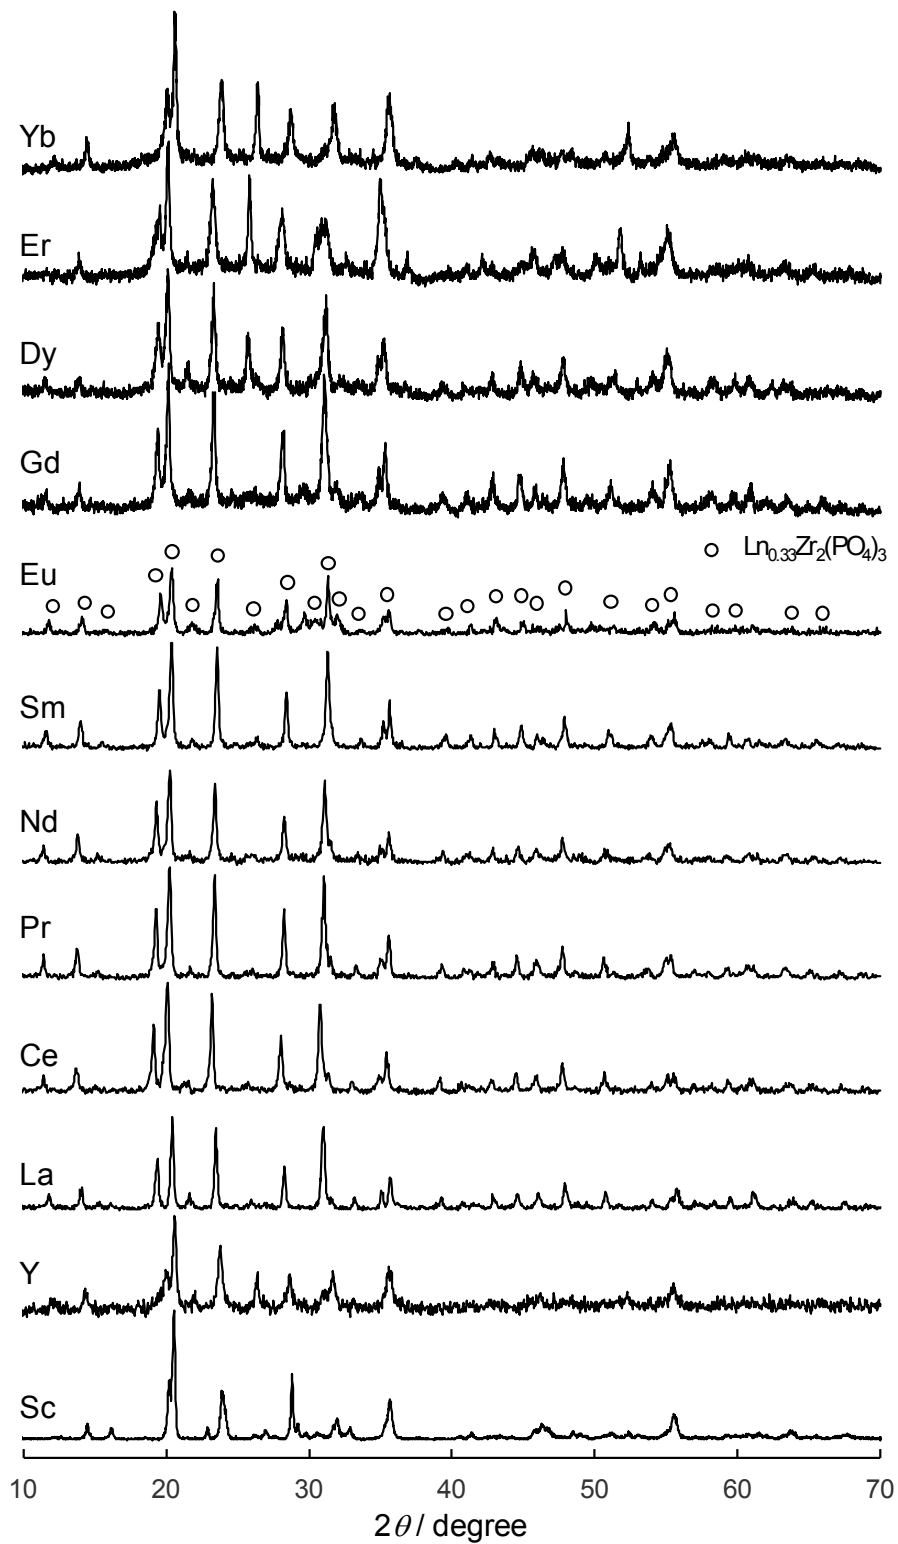

**Figure S3.** XRD patterns of  $\text{Ln}_{0.33}\text{Zr}_2(\text{PO}_4)_3$  as calcined in air at 900 °C.
